# Supplementary material for: A Systematic Review of Child Health and Developmental Outcomes Associated with Low Birthweight and/or Small for Gestational Age in Indigenous Children from Australia, Canada and New Zealand
Source: MDPI journal article supplement (doi:10.3390/ijerph182312669), 2021-12-01
Supplement: s1 [file s1]

## Supplementary Material

### Supplementary Table S1 – Search Terms

#### Pubmed Search Terms

##### #1 Title/Abstract

("Aborigin\*" OR "Indigenous") AND ("Australia\*" OR "New-Zealand\*" OR "Canada\*")

##### #2 Title/Abstract

"Anangu\*" OR "Arrernte\*" OR "Koori\*" OR "Goorie\*" OR "Tiwi\*" OR "Pitjantjatjara\*" OR "Luritja\*" OR "Warlpiri\*" OR "Torres-Strait-Islander\*" OR "First-Nation\*" OR "Inuit\*" OR "Metis\*" OR "Eskimo\*" OR "Cree" OR "Crees" OR "Iroquois\*" OR "Tlingit\*" OR "Kainai\*" OR "Algonquin\*" OR "Anishinaabe\*" OR "Dene" OR "Denes" OR "Nakoda\*" OR "Syilx\*" OR "Maori\*" OR "Moriiori\*" OR "tangata-whenua\*" OR "Ngapuhi\*" OR "Ngati-Porou\*" OR "Ngai-Tahu\*" OR "Waikato\*" OR "north-american-indian\*"

##### #3 Title/Abstract

"Dental" OR "teeth" OR "gum" OR "enamel" OR "body-mass-index" OR "bmi" OR "respiratory" OR "asthma\*" OR "disabilit\*" OR "vision" OR "eye" OR "sight" OR "eyesight" OR "ophthalmic" OR "heart" OR "cardiac" OR "cardio\*" OR "hear" OR "hearing" OR "deaf\*" OR "disease\*" OR "skin" OR "infection\*" OR "development\*" OR "milestone\*" OR "behaviour\*" OR "behavior\*" OR "language" OR "speech" OR "learning" OR "academic" OR "anxiety" OR "depression" OR "suicid\*" OR "health" OR "injur\*" OR "illness\*" OR "hospital\*" OR "health-service\*" OR "resilience" OR "strength\*"

##### #4 Title/Abstract

"Low-birth-weight" OR "small-for-gestational-age" OR "intrauterine-growth-restrict\*" OR "intrauterine-growth-retard\*" OR "fetal-growth-restrict\*" OR "foetal-growth-restrict\*" OR "preterm" OR "pre-term" OR "prematur\*"

##### #5 Title/Abstract

"newborn\*" OR "new-born\*" OR "baby" OR "babies" OR "neonat\*" OR "neo-nat\*" OR "infan\*" OR "toddler\*" OR "pre-schooler\*" OR "preschooler\*" OR "kinder" OR "kinders" OR "kindergarten\*" OR "kinder-aged" OR "boy" OR "boys" OR "girl" OR "girls" OR "child" OR "children" OR "childhood" OR "pediatric\*" OR "paediatric\*" OR "school-age\*" OR "schoolage\*" OR "schoolchild\*" OR "schoolgirl\*" OR "schoolboy\*" OR "adolescen\*" OR "youth" OR "youths" OR "teen" OR "teens" OR "teenage\*"

##### #6 All fields

NOTNLM OR publisher[sb] OR inprocess[sb] OR pubmednotmedline[sb] OR indatereview[sb] OR pubstatusaheadofprint

##### #7 (#1 OR #2) AND #3 AND #4 AND #5

Limits: English language; yr="2000 -Current"; and excludes: books & documents or case reports or comment or editorial or guideline or letter or practice guideline

#### Scopus Search Terms

##### #1 Title/Abstract/Keyword

("Aborigin\*" OR "Indigenous") W/1 ("Australia\*" OR "New-Zealand\*" OR "Canada\*")

##### #2 Title/Abstract/Keyword

"Anangu\*" OR "Arrernte\*" OR "Koori\*" OR "Goorie\*" OR "Tiwi\*" OR "Pitjantjatjara\*" OR "Luritja\*" OR "Warlpiri\*" OR "Torres-Strait-Islander\*" OR "First-Nation\*" OR "Inuit\*" OR "Metis\*" OR "Eskimo\*" OR "Cree" OR "Creeps" OR "Iroquois\*" OR "Tlingit\*" OR "Kainai\*" OR "Algonquin\*" OR "Anishinaabe\*" OR "Dene" OR "Denes" OR "Nakoda\*" OR "Syilx\*" OR "Maori\*" OR "Moriore\*" OR "tangata-whenua\*" OR "Ngapuhi\*" OR "Ngati-Porou\*" OR "Ngai-Tahu\*" OR "Waikato\*" OR "north-american-indian\*"

### #3 Title/Abstract/Keyword

"Dental" OR "teeth" OR "gum" OR "enamel" OR "body-mass-index" OR "bmi" OR "respiratory" OR "asthma\*" OR "disabilit\*" OR "vision" OR "eye" OR "sight" OR "eyesight" OR "ophthalmic" OR "heart" OR "cardiac" OR "cardio\*" OR "hear" OR "hearing" OR "deaf\*" OR "disease\*" OR "skin" OR "infection\*" OR "development\*" OR "milestone\*" OR "behaviour\*" OR "behavior\*" OR "language" OR "speech" OR "learning" OR "academic" OR "anxiety" OR "depression" OR "suicid\*" OR "health" OR "injur\*" OR "illness\*" OR "hospital\*" OR "health-service\*" OR "resilience" OR "strength\*"

### #4 Title/Abstract/Keyword

"Low-birth-weight" OR "small-for-gestational-age" OR "intrauterine-growth-restrict\*" OR "intrauterine-growth-retard\*" OR "fetal-growth-restrict\*" OR "foetal-growth-restrict\*" OR "preterm" OR "pre-term" OR "prematur\*"

### #5 Title/Abstract/Keyword

"pre-schooler\*" OR "preschooler\*" OR "kinder" OR "kinders" OR "kindergarten\*" OR "kinder-aged" OR "boy" OR "boys" OR "girl" OR "girls" OR "child" OR "children" OR "childhood" OR "pediatric\*" OR "paediatric\*" OR "school-age\*" OR "schoolage\*" OR "schoolchild\*" OR "schoolgirl\*" OR "schoolboy\*"

### #6 (#1 OR #2) AND #3 AND #4 AND #5

Limits: English language and yr="2000-Current

## Medline Search Terms

1. exp indians, north american/ or exp inuits/ or exp oceanic ancestry group/
2. ((Aborigin\* or Indigenous) adj1 (Australia\* or New-Zealand\* or Canada\*)).tw,kf,hw.
3. (Anangu\* or Arrernte\* or Koori\* or Goorie\* or Tiwi\* or Pitjantjatjara\* or Luritja\* or Warlpiri\* or Torres-Strait-Islander\* or First-Nation\* or Inuit\* or Metis\* or Eskimo\* or Cree? or Iroquois\* or Tlingit\* or Kainai\* or Algonquin\* or Anishinaabe\* or Dene? or Nakoda\* or Syilx\* or Maori\* or Moriore\* or tangata-whenua\* or Ngapuhi\* or Ngati-Porou\* or Ngai-Tahu\* or Waikato\*).tw,kf.
4. north-american-indian\*.tw,kf.
5. 1 or 2 or 3 or 4
6. (Dental or teeth or gum or enamel or body-mass-index or bmi or respiratory or asthma\* or disabilit\* or vision or eye or sight or eyesight or ophthalmic or heart or cardiac or cardio\* or hear or hearing or deaf\* or disease\* or skin or infection\* or development\* or milestone? or behavio?r\* or language or speech or learning or academic or anxiety or depression or suicid\* or health or injur\* or illness\* or hospital\* or health-service? or resilience or strength?).tw,kf,hw.
7. exp Infant, Low Birth Weight/

8. (Low-birth-weight or small-for-gestational-age or intrauterine-growth-restrict\* or intrauterine-growth-retard\* or f?etal-growth-restrict\*).tw,kf.
9. exp infant, premature/ or exp infant, premature, diseases/ or Premature Birth/
10. (preterm or pre-term or prematur\*).tw,kf.
11. 7 or 8 or 9 or 10
12. (pre-schooler\* or preschooler\* or kinder or kinders or kindergarten\* or kinder-aged or boy or boys or girl or girls or child or children or childhood or pediatric\* or paediatric\* or school-age\* or schoolage\* or schoolchild\* or schoolgirl\* or schoolboy\*).tw,kf,hw,in.
13. 5 and 6 and 11 and 12
14. limit 13 to (case reports or comment or editorial or guideline or letter or practice guideline)
15. 13 not 14
16. limit 15 to (english language and yr="2000 -Current")

### Web Of Science Search Terms

#1 TS=((Aborigin\* OR Indigenous) NEAR/1 (Australia\* OR New-Zealand\* OR Canada\*)) OR  
 TI=((Aborigin\* OR Indigenous) NEAR/1 (Australia\* OR New-Zealand\* OR Canada\*)) OR  
 AB=((Aborigin\* OR Indigenous) NEAR/1 (Australia\* OR New-Zealand\* OR Canada\*))

#2 TS=(Anangu\* OR Arrernte\* OR Koori\* OR Goorie\* OR Tiwi\* OR Pitjantjatjara\* OR Luritja\*  
 OR Warlpiri\* OR Torres-Strait-Islander\* OR First-Nation\* OR Inuit\* OR Metis\* OR Eskimo\* OR Cree  
 OR Crees OR Iroquois\* OR Tlingit\* OR Kainai\* OR Algonquin\* OR Anishinaabe\* OR Dene OR Denes  
 OR Nakoda\* OR Syilx\* OR Maori\* OR Moriori\* OR tangata-whenua\* OR Ngapuhi\* OR Ngati-Porou\*  
 OR Ngai-Tahu\* OR Waikato\* OR north-american-indian\*) OR TI=(Anangu\* OR Arrernte\* OR Koori\*  
 OR Goorie\* OR Tiwi\* OR Pitjantjatjara\* OR Luritja\* OR Warlpiri\* OR Torres-Strait-Islander\* OR First-  
 Nation\* OR Inuit\* OR Metis\* OR Eskimo\* OR Cree OR Crees OR Iroquois\* OR Tlingit\* OR Kainai\*  
 OR Algonquin\* OR Anishinaabe\* OR Dene OR Denes OR Nakoda\* OR Syilx\* OR Maori\* OR Moriori\*  
 OR tangata-whenua\* OR Ngapuhi\* OR Ngati-Porou\* OR Ngai-Tahu\* OR Waikato\* OR north-  
 american-indian\*) OR AB=(Anangu\* OR Arrernte\* OR Koori\* OR Goorie\* OR Tiwi\* OR Pitjantjatjara\*  
 OR Luritja\* OR Warlpiri\* OR Torres-Strait-Islander\* OR First-Nation\* OR Inuit\* OR Metis\* OR  
 Eskimo\* OR Cree OR Crees OR Iroquois\* OR Tlingit\* OR Kainai\* OR Algonquin\* OR Anishinaabe\*  
 OR Dene OR Denes OR Nakoda\* OR Syilx\* OR Maori\* OR Moriori\* OR tangata-whenua\* OR  
 Ngapuhi\* OR Ngati-Porou\* OR Ngai-Tahu\* OR Waikato\* OR north-american-indian\*)

#3

TS=(Dental OR teeth OR gum OR enamel OR body-mass-index OR bmi OR respiratory OR asthma\*  
 OR disabilit\* OR vision OR eye OR sight OR eyesight OR ophthalmic OR heart OR cardiac OR cardio\*  
 OR hear OR hearing OR deaf\* OR disease\* OR skin OR infection\* OR development\* OR milestone\*  
 OR behaviour\* OR behavior\* OR language OR speech OR learning OR academic OR anxiety OR  
 depression OR suicid\* OR health OR injur\* OR illness\* OR hospital\* OR health-service\* OR resilience  
 OR strength\*) OR TI=(Dental OR teeth OR gum OR enamel OR body-mass-index OR bmi OR  
 respiratory OR asthma\* OR disabilit\* OR vision OR eye OR sight OR eyesight OR ophthalmic OR  
 heart OR cardiac OR cardio\* OR hear OR hearing OR deaf\* OR disease\* OR skin OR infection\* OR  
 development\* OR milestone\* OR behaviour\* OR behavior\* OR language OR speech OR learning OR  
 academic OR anxiety OR depression OR suicid\* OR health OR injur\* OR illness\* OR hospital\* OR

health-service\* OR resilience OR strength\*) OR AB=(Dental OR teeth OR gum OR enamel OR body-mass-index OR bmi OR respiratory OR asthma\* OR disabilit\* OR vision OR eye OR sight OR eyesight OR ophthalmic OR heart OR cardiac OR cardio\* OR hear OR hearing OR deaf\* OR disease\* OR skin OR infection\* OR development\* OR milestone\* OR behaviour\* OR behavior\* OR language OR speech OR learning OR academic OR anxiety OR depression OR suicid\* OR health OR injur\* OR illness\* OR hospital\* OR health-service\* OR resilience OR strength\*)

#4

TS=(Low-birth-weight OR small-for-gestational-age OR intrauterine-growth-restrict\* OR intrauterine-growth-retard\* OR fetal-growth-restrict\* OR foetal-growth-restrict\* OR preterm OR pre-term OR prematur\*) OR TI=(Low-birth-weight OR small-for-gestational-age OR intrauterine-growth-restrict\* OR intrauterine-growth-retard\* OR fetal-growth-restrict\* OR foetal-growth-restrict\* OR preterm OR pre-term OR prematur\*) OR AB=(Low-birth-weight OR small-for-gestational-age OR intrauterine-growth-restrict\* OR intrauterine-growth-retard\* OR fetal-growth-restrict\* OR foetal-growth-restrict\* OR preterm OR pre-term OR prematur\*)

#5

TS=(pre-schooler\* OR preschooler\* OR kinder OR kinders OR kindergarten\* OR kinder-aged OR boy OR boys OR girl OR girls OR child OR children OR childhood OR pediatric\* OR paediatric\* OR school-age\* OR schoolage\* OR schoolchild\* OR schoolgirl\* OR schoolboy\*) OR TI=(pre-schooler\* OR preschooler\* OR kinder OR kinders OR kindergarten\* OR kinder-aged OR boy OR boys OR girl OR girls OR child OR children OR childhood OR pediatric\* OR paediatric\* OR school-age\* OR schoolage\* OR schoolchild\* OR schoolgirl\* OR schoolboy\*) OR AB=(pre-schooler\* OR preschooler\* OR kinder OR kinders OR kindergarten\* OR kinder-aged OR boy OR boys OR girl OR girls OR child OR children OR childhood OR pediatric\* OR paediatric\* OR school-age\* OR schoolage\* OR schoolchild\* OR schoolgirl\* OR schoolboy\*)

#6      (#1 OR #2) AND #3 AND #4 AND #5

Limits: English language and yr="2000-Current
